1 Grandparent inference from genetic data: The potential for parentage-based tagging programs to  
2 identify offspring of hatchery strays

3

4 Thomas A. Delomas<sup>1\*</sup> and Matthew Campbell<sup>2</sup>

5

6 <sup>1</sup>Pacific States Marine Fisheries Commission / Idaho Department of Fish and Game, Eagle Fish  
7 Genetics Laboratory, 1800 Trout Rd, Eagle, ID 83616

8

9 <sup>2</sup>Idaho Department of Fish and Game, Eagle Fish Genetics Laboratory, 1800 Trout Rd, Eagle,  
10 ID, 83616

11

12 \*Corresponding author: [thomas.delomas@usda.gov](mailto:thomas.delomas@usda.gov); current address: USDA Agricultural  
13 Research Service, National Cold Water Marine Aquaculture Center, 483 CBLS, 120 Flagg Road,  
14 Kingston, RI, 02881

15

16 Running head: Grandparent-grandchild trio inference

17

18 Abstract

19 Fisheries managers routinely use hatcheries to increase angling opportunity. Many  
20 hatcheries operate as segregated programs where hatchery-origin fish are not intended to spawn  
21 with natural-origin conspecifics in order to prevent potential negative effects on the natural-  
22 origin population. Currently available techniques to monitor the frequency with which hatchery-  
23 origin strays successfully spawn in the wild rely on either genetic differentiation between the  
24 hatchery- and natural-origin fish or extensive sampling of fish on the spawning grounds. We  
25 present a method to infer grandparent-grandchild trios using only genotypes from two putative  
26 grandparents and one putative grandchild. We developed estimators of false positive and false  
27 negative error rates and showed that genetic panels containing 500 - 700 single nucleotide  
28 polymorphisms or 200 - 300 microhaplotypes are expected to allow application of this technique  
29 for monitoring segregated hatchery programs. We discuss the ease with which this technique can  
30 be implemented by pre-existing parentage-based tagging programs and provide an R package  
31 that applies the method.

32

33 [A]Introduction

34 Fisheries managers have long used hatcheries to increase angling opportunity and to  
35 compensate for anthropogenic impacts that have decreased population sizes (Waples et al. 2007).  
36 In some situations, it has been observed that hatchery-origin fish have lower fitness in the wild  
37 relative to natural-origin conspecifics, potentially due to selection in the hatchery environment or  
38 the use of hatchery strains that are not locally adapted (Ford 2002; Miller et al. 2004; Araki et al.  
39 2007a, 2007b, 2008; Christie et al. 2014). In order to prevent negative effects of hatchery- and  
40 natural-origin fish interbreeding, it has been recommended that hatcheries operate as either  
41 integrated or segregated programs (Hatchery Scientific Review Group 2009). Integrated  
42 programs aim to balance the proportion of natural-origin fish in the hatchery broodstock and the  
43 proportion of hatchery-origin fish spawning naturally to minimize the effect of domestication  
44 (Goodman 2005). Segregated programs intend to minimize gene flow between hatchery- and  
45 natural-origin populations (Mobrand et al. 2005; Hatchery Scientific Review Group 2009). These  
46 strategies, developed in the context of Pacific salmon hatcheries, represent alternative  
47 approaches to both protect natural-origin populations and provide harvest opportunities for  
48 anglers.

49 In order to evaluate the efficacy of segregated hatchery programs, a method of  
50 monitoring gene flow from hatchery-origin fish to nearby natural-origin populations is needed.  
51 This has been previously estimated in several ways. Some studies estimate the proportion of fish  
52 on the spawning grounds that are of hatchery origin (pHOS) through observation of marks and/or  
53 tags present on hatchery fish (Dauer et al. 2009; Tattam and Ruzycski 2020). This metric is  
54 important as it demonstrates the potential for competition between hatchery- and natural-origin  
55 fish on the spawning grounds and suggests that hatchery introgression may be occurring.

56 Alternatively, if the hatchery- and natural-origin populations show sufficient genetic  
57 differentiation, migration rates can be estimated from temporal samples (van Doornik et al.  
58 2013), or genetic structure of hatchery- and natural-origin populations can be evaluated to  
59 determine whether the pattern indicates hatchery introgression (Matala et al. 2012; Ozerov et al.  
60 2016; Lehnert et al. 2020). All of these approaches have drawbacks. Observing the proportion of  
61 hatchery-origin fish on the spawning grounds, while suggestive, does not directly assess gene  
62 flow as the reproductive success of hatchery-origin fish is unknown. Methods utilizing genetic  
63 differentiation are not applicable to cases without sufficient differentiation between the hatchery-  
64 and natural-origin populations, which is common where hatchery stocks were derived from  
65 nearby natural-origin populations.

66 An alternative technique uses genetic samples to infer relationships between hatchery  
67 broodstock and individuals sampled in the wild. Hatchery broodstock can be genetically sampled  
68 at the time of spawning, and their genotypes later used to infer whether a given fish is a  
69 descendent of hatchery broodstock. Parentage-based tagging (PBT) uses this approach to identify  
70 offspring of the hatchery broodstock for monitoring and management of hatchery stocks  
71 (Anderson and Garza 2005, 2006). Parentage-based tagging has been implemented and validated  
72 on large and small scales for a variety of species (DeHaan et al. 2008; Denson et al. 2012; Evans  
73 et al. 2018; Bingham et al. 2018; Campbell et al. 2019; Vandeputte et al. 2021), most notably  
74 Pacific salmonids (Steele et al. 2013, 2019; Beacham et al. 2019).

75 With appropriate methods for statistical inference, the general approach of PBT can be  
76 extended to identify grandchildren of hatchery broodstock. Genetic samples can be taken from  
77 hatchery broodstock, and samples from natural-origin fish can later be assessed to determine if  
78 they are grandchildren of those broodstock (and therefore had an unsampled, hatchery-origin

79 parent). The relationship being inferred is a grandparent-grandchild trio consisting of one  
80 grandchild and two grandparents on the same side (i.e., either both maternal or both paternal  
81 grandparents). The other two grandparents and the parents are unsampled and therefore have  
82 unknown genotypes (Figure 1). While comprehensive sampling in the hatchery is  
83 straightforward, similar sampling of adults spawning naturally is often logistically prohibitive.  
84 The ability to infer recent hatchery ancestry without sampling naturally spawning parents would  
85 overcome this issue.

86       Methods have previously been developed for inferring grandparent-grandchild  
87 relationships, but these methods are not optimal for inferring grandparent-grandchild trios.  
88 Letcher and King (2001) describe a method for inferring the relationship between all four  
89 grandparents and a grandchild. To identify offspring of hatchery strays, this method requires  
90 sampling natural-origin grandparents as well as hatchery broodstock which is not feasible in  
91 many situations. Christie et al. (2011) describe a method to infer grandparent-grandchild trios by  
92 identifying trios with no observed Mendelian incompatibilities (or less than a specified number).  
93 While this method has been successfully applied to situations where one parent is known  
94 (Christie et al. 2011; Sard et al. 2016), the lower power of exclusionary methods compared to  
95 likelihood-based methods (Anderson and Garza 2006) make exclusionary methods less feasible  
96 when no parents are sampled.

97       We here report a likelihood-based method to identify grandparent-grandchild trios using  
98 genotypes. Additionally, we develop techniques to estimate assignment error rates for this  
99 method and provide an R package implementing the described techniques  
100 (<https://github.com/delomast/gRandma>).

101

102 [A]Methods

103 [C]*Inferring grandparent-grandchild relationships.*—

104 Relationships have previously been inferred from genetic data using likelihood ratios to  
105 compare the putative relationship (e.g. parent-offspring) to an alternative relationship (typically  
106 that the individuals are unrelated) (Marshall et al. 1998; Anderson and Garza 2006; Kalinowski  
107 et al. 2007; Anderson 2012). Methods for calculating likelihoods of relationships (simple  
108 pedigrees) have previously been detailed (Thompson 1976, 2000; SanCristobal and Chevalet  
109 1997; Anderson and Garza 2006), and we extended this approach specifically to grandparent-  
110 grandchild trios. Given allele frequencies for a locus under Hardy-Weinberg equilibrium (HWE),  
111 the likelihood of the three individuals being unrelated was calculated as the product of the  
112 probability of sampling each genotype from the population. The likelihood of the individuals  
113 being a grandparent-grandchild trio was calculated by utilizing allele frequencies and the laws of  
114 Mendelian inheritance. Genotyping error was accounted for by marginalizing the true genotypes  
115 utilizing estimates of genotyping error (Anderson and Garza 2006). This allows genotyping error  
116 to be flexibly modeled in any way that yields, for a given true genotype, the probability of  
117 observing each genotype. With the R package we provide, users can specify these probabilities or  
118 utilize a default error model. The default error model, used in the analyses described in this  
119 study, is described in supplementary file 1. Loci were considered to be independent, as in  
120 previous methods of relationship inference and pedigree reconstruction (Marshall et al. 1998;  
121 Riester et al. 2009; Jones and Wang 2010; Anderson 2012; Huisman 2017).

122 Calculating likelihoods for large numbers of possible trios can be computationally  
123 intensive. We therefore implemented a preliminary screen based on the observed number of  
124 Mendelian incompatibilities (MI) in a grandparent-grandchild trio. Trios with more than  $m$  MIs

125 were excluded from consideration. The value of  $m$  was chosen so that the probability of  
126 excluding a true grandparent-grandchild trio was less than 0.0001 for a trio with no missing  
127 genotypes. With a constant value of  $m$ , the probability of rejecting a trio with one or more  
128 missing genotypes is smaller, as a locus with a missing genotype cannot be considered a  
129 Mendelian incompatibility. The probability of rejecting a true trio given a value of  $m$  was  
130 calculated by representing the number of MIs as a Markov Chain, following the method detailed  
131 by Anderson (2012) but extended to the relationship of grandparent-grandchild trio.

132         Assigning grandparent-grandchild relationships can be treated as a hypothesis test by  
133 comparing the calculated log-likelihood ratio (LLR) to a critical value,  $c$  (SanCristobal and  
134 Chevalet 1997; Anderson and Garza 2006). If the LLR was greater than or equal to  $c$ , the trio  
135 was considered related; otherwise, the trio was considered unrelated. The value of  $c$  can be  
136 chosen to achieve a desired balance of false negative and false positive error rates.

137

138 [C]*False positive error rates.*—

139         Per-comparison false positive error rates (probability of assigning a relationship to a trio  
140 that is not a grandparent-grandchild trio) are dependent upon the true relationship for a trio. We  
141 have implemented methods to assess false positive error rates for unrelated trios (typically the  
142 most important) as well as 13 other types of relationships. In these relationships, the two putative  
143 grandparents were considered unrelated to each other, but the putative grandparents had different  
144 relationships to the putative grandchild. The relationships considered represented combinations  
145 of true grandparents, individuals unrelated to the putative grandchild, great-aunts, half-great-  
146 aunts, and first cousins of the putative grandchild's true grandparent.

147         Estimating the per-comparison false positive error rate for a given value of  $c$  has been

148 demonstrated for parent-offspring and sibling relationships using importance sampling  
149 (Anderson and Garza 2006; Baetscher et al. 2018), a Monte Carlo variance reduction technique.  
150 Variance reduction is needed as a naïve Monte Carlo approach would be inefficient at estimating  
151 very small false positive rates (Anderson and Garza 2006). Small error rates can be meaningful  
152 as the experiment-wide false positive error rate is estimated by the product of the per-comparison  
153 false positive error rate and the number of trios (with the corresponding true relationship)  
154 considered. We extended this approach to the current application of assessing grandparent-  
155 grandchild trios. We also implemented an alternative method utilizing stratified sampling,  
156 another Monte Carlo variance reduction technique, because specific implementations of  
157 importance sampling can produce unreliable results (Owen 2013).

158

159 [C]*Importance sampling.*—

160 A standard Monte Carlo estimator of false positive rates would be obtained by simulating  
161 genotypes for trios of a given relationship (such as unrelated) and recording how many fit the  
162 criteria to be considered related. Importance sampling can be thought of as focusing the  
163 simulation on producing mostly genotypes that do assign and then correcting for this  
164 modification. To implement importance sampling, we simulated genotypes from the distribution  
165 of genotypes in true grandparent-grandchild trios. Missing genotypes were accounted for  
166 utilizing the forward-backward algorithm described below with the state of the Markov chain  
167 representing the number of missing genotypes in one individual. If the simulated trio had fewer  
168 than  $m$  MIs and the calculated LLR was greater than or equal to  $c$ , the observation was recorded  
169 as a false positive with the appropriate importance sampling weight (Owen 2013).

170



171 [C]*Stratified sampling*.—

172         Similar to importance sampling, the goal of stratified sampling was to focus simulation  
173 effort on categories (strata) that produce false positives. We stratified the distribution of trio  
174 genotypes by the number of observed MIs. This was a natural choice because the algorithm we  
175 use explicitly filters possibilities based on the number of observed MIs. Therefore, we can  
176 eliminate simulating genotypes for most strata. Sampling effort can then be focused on trios with  
177  $m$  or fewer MIs. This method requires calculating the probability that a trio of given relationship  
178 has a given number of observed MIs and the ability to simulate genotypes for a trio given a  
179 relationship and number of MIs. Genotypes for trios were simulated in each stratum and the false  
180 positive rates were recorded. Utilizing the probabilities that a trio has each number of MIs (i.e.,  
181 the size of the strata), the overall false positive rate was then calculated.

182         To calculate the probability a trio has a given number of observed MIs, we represented  
183 the observation of MIs and missing genotypes as a Markov chain and utilized the forward step of  
184 the forward-backward algorithm. We extended the approach described by Anderson (2012) to  
185 account for the common practice of only analyzing samples given a maximum number of  
186 missing genotypes,  $d$ , and to fit the target relationships. The value of  $d$  in the current analyses  
187 was 10% of loci. Let  $s_i$  be the state, describing the number of observed MIs and missing  
188 genotypes, after observing locus  $i$ . Prior to observing any loci,  $s_0 = (0,0,0,0)$ , representing the  
189 number of observed incompatibilities and number of missing genotypes for the three individuals.  
190 Let  $a_i$  be a vector indicating whether an incompatibility or any missing genotypes are observed  
191 at locus  $i$ , in the same order as  $s_i$ . Assuming HWE, known allele frequencies, known locus-  
192 specific probabilities of a genotype being missing, and observation of missing genotypes is  
193 independent across loci and individuals, the probabilities of each possibility for  $a_i$  can be

194 calculated according to standard probability arguments for a given true relationship. The  
195 probability of being in state  $x$  after a given locus can then be calculated as

$$P(s_{i+1} = x) = P(s_i) \sum_a P(a_{i+1}) I\{s_i + a_{i+1} = x\}. \quad (1)$$

196 This can be evaluated recursively to obtain the probabilities of each final state. The probability a  
197 trio has a given number of observed MIs conditional on  $d$  can then be calculated.

198         However, memory constraints make saving all the probabilities at each step impractical  
199 even with moderate numbers of loci. We can save only the probabilities of states with  $m$  or fewer  
200 MIs and with all three individuals having  $d$  or fewer missing genotypes to reduce memory usage.  
201 These values are divided by the probability that all members have  $d$  or fewer missing genotypes  
202 to obtain probabilities of being in each state conditional on  $d$ . The probability of observing an  
203 individual with more than  $d$  missing genotypes can be obtained through the same algorithm  
204 (forwards step), but with  $s$  and  $a$  now only representing missing genotypes in one individual.  
205 Because we assumed that missing genotypes are independent between individuals (given locus-  
206 specific rates of missing genotypes), the probability of all three samples having  $d$  or fewer  
207 missing genotypes is straightforward to calculate using the obtained probability that one  
208 individual has more than  $d$  missing genotypes.

209         To utilize stratified sampling, we need to simulate genotypes for trios with a specified  
210 number of MIs. The backwards step of the forward-backward algorithm fills this need. Given  $L$   
211 loci, a value of  $s_L$  is chosen given the number of MIs by sampling a categorical distribution with  
212 probabilities proportional to the probability of each  $s_L$  that has the specified number of MIs (and  
213 allowable number of missing genotypes). Next, for each locus and iterating backwards, a value  
214 for  $a_i$  is chosen by sampling a categorical distribution with

$$P(a_i|s_{i+1}) \propto P(a_i)P(s_i = s_{i+1} - a_i). \quad (2)$$

215 Once  $a_i$  is chosen, genotypes are sampled using the genotype frequencies for the true  
216 relationship calculated from the allele frequencies, HWE, laws of Mendelian inheritance, and  
217 genotyping error rates. If all three genotypes are observed (i.e., no missing genotypes in the  
218 chosen  $a_i$ ), then the genotypes are either sampled conditional upon an MI being present or not.  
219

220 [C]*False negative error rate.*—

221 To estimate the per-comparison false negative error rate (probability of failing to assign a  
222 relationship to a true grandparent-grandchild trio) for a given value of  $c$ , Monte Carlo methods  
223 have been previously used for other relationships (Anderson and Garza 2006; Baetscher et al.  
224 2018) and we adopted this strategy here. Genotypes of grandparent-grandchild trios are  
225 simulated and loci with missing genotypes for each individual are chosen by representing the  
226 observation of missing genotypes as a Markov chain and utilizing the forward-backward  
227 algorithm, as described above with the state representing the number of missing genotypes in one  
228 individual. Log-likelihood ratios were calculated for the simulated genotypes, and the proportion  
229 of trios with the number of MIs greater than  $m$  or LLR less than  $c$  was the estimate of the false  
230 negative rate.

231

232 [C]*Panel size simulations and error rate estimator evaluation.*—

233 A key question for designing experiments implementing this method is, how many loci  
234 need to be genotyped to obtain reliable assignments? To help answer this question, we estimated  
235 error rates for panels of different size. We simulated panels containing 100, 300, 500, 700, and  
236 900 biallelic single nucleotide polymorphisms (SNPs) and panels containing 100, 200, 300, and

237 400 triallelic microhaplotypes. The SNPs and microhaplotypes were simulated with expected  
238 heterozygosity of 0.22 (allele frequencies of 0.125 and 0.872) and 0.42 (allele frequencies of  
239 0.13, 0.13, and 0.74), respectively. This choice reflects the mean expected heterozygosities for  
240 SNPs and microhaplotypes in a comparison of both marker types for relationship inference in  
241 rockfish (Baetscher et al. 2018). The power of a given marker for kinship inference is directly  
242 related to its variability (Anderson and Garza, 2006). While we investigated marker panels of  
243 differing size but fixed variability, similar power to the simulated panels could be achieved with  
244 fewer, more variable markers. The probability of a missing genotype at a locus was set at 3% in  
245 these analyses. It is common practice to remove any samples with more than a threshold number  
246 of missing genotypes, and so we restricted all simulated genotypes to have 90% or more  
247 genotypes present. Given a true relationship of unrelated, false negative and false positive error  
248 rates were estimated for a range of  $c$  values and the relationship between error rates was  
249 compared between panels. Integer values of  $c$  were chosen starting at 0 and increasing until the  
250 estimated false negative rate was above 0.05. Estimates of false negative rates and estimates  
251 from the importance sampling method were derived from 10,000 and 1,000,000 Monte Carlo  
252 iterations, respectively. Estimates from the stratified sampling routine were derived from  
253 1,000,000 iterations for each stratum (number of observed Mendelian incompatibilities) less than  
254 or equal to  $m$ .

255 To compare performance of the two methods for estimating false positive error rates, we  
256 compared the estimated error rates for unrelated trios between the methods with all four  
257 simulated microhaplotype panels. Estimates for other true relationships were compared using the  
258 300 locus microhaplotype panel. Finally, to examine the importance of modelling the presence of  
259 missing genotypes, we compared importance sampling estimates using the 300 locus

260 microhaplotype panel with the probability of a genotype being missing equal to 3% and 0%.

261 The scripts used to perform these simulations and their outputs are available at

262 <https://github.com/delomast/gpError2021>.

263

264 [C]*Example analyses.*—

265 To fully evaluate false positive per-comparison error rates, one needs to have a general  
266 idea of the size of the analysis (number of comparisons) being attempted. We consider two  
267 examples modeled around steelhead *Oncorhynchus mykiss* hatchery programs in the Snake River  
268 basin using data collected during 2018. The Upper Salmon B-run (USB) represents a smaller  
269 hatchery program and spawned 66 steelhead in 2018. The Dworshak National Fish Hatchery  
270 (DNFH) represents a larger hatchery program and spawned 1,778 steelhead in 2018. Both of  
271 these hatchery programs take genetic samples from all broodstock and record the day of  
272 spawning, phenotypic sex, and crosses made. Data collected at the hatchery (or a genetic sex  
273 marker) can be used to constrain the number of possible pairs of grandparents considered in an  
274 analysis. For each hatchery program, we consider the effect on the desired per-comparison false  
275 positive rate of using no data, phenotypic sex, spawn day, phenotypic sex and spawn day, or  
276 cross records.

277 In the example analysis, we assume that natural-origin juveniles are sampled and that  
278 exact age is unknown but is constrained to one, two, or three years old. The effect of this  
279 assumption is that three potential years of parents must be considered for each juvenile.

280 Hatchery-origin steelhead in the Snake River basin return almost exclusively as three and four  
281 year old fish (Warren et al. 2017), so this translates to four years of potential grandparents that  
282 must be considered.

283           The total number of comparisons in these analyses is the product of the number of  
284 possible pairs of grandparents per year, the number of years of potential grandparents being  
285 considered (four), and the number of potential grandchildren evaluated (assumed here to be 200).  
286 We then calculate the desired per-comparison false positive (true relationship of unrelated) error  
287 rate to achieve an expected number of false positive assignments of 0.1 ( $0.1 / \text{number of}$   
288 comparisons) assuming all trios are unrelated. This ignores false positives arising from trios of  
289 other relationships. In some situations, error rates for alternative relationships are important to  
290 consider, but in analyses of segregated hatchery programs (where no breeding of hatchery-origin  
291 and natural-origin fish is desired), false positives arising from trios of other relationships are not  
292 necessarily harmful as the purpose is to identify fish with recent hatchery-origin ancestry.

293

#### 294 [A]Results

295           Estimated error rates declined with increasing panel size, and the microhaplotype panels  
296 showed lower error rates than SNP panels of similar size (Figure 2). For example, false positive  
297 error rates (true relationship of unrelated) below  $10^{-10}$  were achieved at false negative error rates  
298 below 0.05 with SNP panels containing 700 or more loci and microhaplotype panels containing  
299 300 or more loci. False positive rates for related trios decreased with decreasing relatedness  
300 between individuals in the trio (Supplemental Figure 1).

301           False positive rates estimated by importance sampling and stratified sampling were  
302 practically identical when estimates were above approximately  $10^{-8}$  (Figure 3). As the false  
303 positive rate decreased below this, the importance sampling method estimated false positive rates  
304 higher than the stratified sampling method. In these cases, the stratified sampling method  
305 estimated false positive rates of 0 within one or more strata (i.e., no false positives were sampled

306 out of the 1,000,000 iterations). Similar results were obtained for false positive rates estimated  
307 for trios with relationships other than unrelated (Figure 4) except for two trio types (true  
308 grandparent and unrelated; true grandparent and cousin of grandparent) that had noticeably  
309 different estimates between the two methods and did not have a low false positive rate.

310         Incorporating a 3% missing genotype rate in the error rate estimation had a moderate  
311 effect on the results (Figure 5). For example, at a false negative rate of 0.05, the false positive  
312 (true relationship of unrelated) error rates were approximately (derived from linear interpolation  
313 with neighboring points)  $1.3 \cdot 10^{-11}$  and  $2.1 \cdot 10^{-12}$  when missing genotypes had rates of 3% and  
314 0%, respectively.

315         The example hatchery programs considered show that analysis of smaller programs (e.g.,  
316 USB) require per-comparison false positive rates on the order of  $10^{-6}$  -  $10^{-8}$  depending on what  
317 data, if any, are available to reduce the number of comparisons (Table 1). Larger programs,  
318 similar to DNFH, require rates on the order of  $10^{-7}$  -  $10^{-10}$  if the number of comparisons can be  
319 reduced by one of the data sources considered. Error rates estimated for the simulated panels  
320 (Figure 2) suggest that these rates can be achieved with panels containing 500 - 700 SNPs or 200  
321 - 300 microhaplotypes. If no data are available to reduce the number of pairs of grandparents that  
322 must be considered, then hatchery programs similar in size to DNFH (1,700 fish spawned / year)  
323 will require error rates on the order of  $10^{-11}$ , which is achievable with panels containing 700 -  
324 900 SNPs or 300 - 400 microhaplotypes.

325

326 [A]Discussion

327         The methods developed here facilitate direct monitoring of introgression between  
328 hatchery- and natural-origin populations without relying on genetic differentiation. This fills an

329 unmet need for monitoring the segregated hatchery programs upon which many fisheries rely.  
330 The method identifies fish with an unsampled, hatchery-origin parent using genetic samples from  
331 the hatchery broodstock and estimates error rates given allele frequencies for a population.

332 Another benefit of this method is the ease with which it can be implemented through  
333 existing PBT programs because the hatchery and laboratory processes required to sample and  
334 genotype broodstock are already in place. Additional requirements for grandparent inference  
335 would be the development of a genetic panel with sufficient power (given the size of the relevant  
336 hatcheries) and collection of samples from natural-origin fish that are potential grandchildren of  
337 the hatchery broodstock. In the past decade, there have been multiple, large-scale demonstrations  
338 of the efficacy of PBT for monitoring fisheries (Steele et al. 2013, 2019; Beacham et al. 2019).  
339 Numerous PBT programs have been recently reported (Evans et al. 2018; Bingham et al. 2018;  
340 Campbell et al. 2019; Vandeputte et al. 2021) and current tagging technologies can be replaced  
341 by PBT to provide additional benefits at similar or reduced costs (Beacham 2021). This implies  
342 that PBT will continue to grow in usage, and the method described here will become feasible for  
343 a larger number of hatchery programs.

344 The simulated microhaplotype panels demonstrated that error rates low enough for  
345 relatively large analyses of segregated hatchery programs are achievable with panels containing  
346 300 - 400 microhaplotypes. The size/power required from the genetic marker panel will depend  
347 on the data available to limit the number of comparisons. As has been previously demonstrated,  
348 the availability of accurate hatchery cross-records greatly reduces the power required for  
349 grandparent inference (Letcher and King 2001), but we note that simply having sex information  
350 associated with a broodstock individual's genotype can have a sizeable effect (Table 1). Panels  
351 genotyping hundreds of loci have been created using cost-effective, amplicon sequencing



352 techniques (Campbell et al. 2015; Janowitz-Koch et al. 2019), and so we conclude that  
353 grandparent inference with this method is feasible using current genotyping techniques.

354       Application of this method at larger scales will require considering potential grandparents  
355 from multiple hatcheries. In these situations, having data available to reduce the number of  
356 comparisons can be critical for making an analysis feasible. For example, if natural-origin  
357 steelhead are sampled at Lower Granite Dam on the Snake River (Hargrove et al. 2021), then all  
358 steelhead hatcheries adjacent to and upstream of the dam must be considered (approximately  
359 5,000 total steelhead spawned annually). With no data other than the year and hatchery at which  
360 fish were spawned, the number of potential pairs of grandparents would be approximately  $5.5 \cdot$   
361  $10^6$  each year, while considering phenotypic (or genetic) sex would reduce this to  $1.4 \cdot 10^6$   
362 (IDFG, unpublished).

363       We expect this method to be most applicable for assessing segregated hatchery programs.  
364 For some closely related trios, false positive error rates were relatively high with the 300  
365 microhaplotype panel (Supplemental Figure 1). For all analyses, the impact of these error rates is  
366 mediated by the infrequency of comparisons involving closely related individuals. When  
367 analyzing segregated programs, false positives from closely related trios may not negatively  
368 impact conclusions as they indicate recent hatchery ancestry. However, when analyzing  
369 integrated hatchery programs, distinguishing trios with different relationships can be important.  
370 Application of this method could then either be infeasible or require a more powerful genetic  
371 panel. Additionally, the number of relationships for which we provide estimators covers trios  
372 with a range of relatedness but is not exhaustive. In some specific cases, other relationships may  
373 be present at impactful frequencies. For example, if generations overlap substantially then the  
374 impact of trios containing aunts, half-aunts, and first-cousins may need to be considered.

375           The method developed here addressed shortcomings of previously developed methods for  
376 grandparent inference with moderately sized genetic panels. Previous methods required either  
377 that all four grandparents were sampled (Letcher and King 2001) or used an exclusionary method  
378 that inherently had lower power than likelihood-based methods (Christie et al. 2011).  
379 Additionally, the exclusionary method did not provide a formal treatment of genotyping error.  
380 Applications of the exclusionary method (Christie et al. 2011; Sard et al. 2016) have utilized  
381 panels of tens of microsatellites. When using SNPs or microhaplotypes, hundreds or thousands  
382 of loci are typically genotyped and minimal error rates (e.g., 1%) still result in errors being  
383 present in a majority of individuals. An additional effect of ignoring genotyping error in an  
384 exclusionary method is that false negatives are implicitly assumed not to occur. It is worth noting  
385 that use of a Markov chain to model the number of observed Mendelian incompatibilities and  
386 missing genotypes in a trio, as we developed here, could be incorporated into the exclusionary  
387 method. This would allow both the formal incorporation of genotyping error and estimation of  
388 false positive and false negative error rates.

389           Importance sampling and stratified sampling have different weaknesses, making each  
390 better suited to different situations. For example, importance sampling can perform suboptimally  
391 when the estimate is dominated by a small fraction of samples (Owen 2013). Stratified sampling  
392 does not have this same drawback, but it can fail to give a meaningful estimate when the false  
393 positive rate within a particular stratum is low enough that a reasonable number of samples  
394 cannot estimate it accurately. Comparison of the importance sampling and stratified sampling  
395 methods showed that when the true relationship was unrelated, they estimated essentially the  
396 same false positive rate when that rate was above approximately  $10^{-8}$ . This suggests the  
397 importance sampling routine performed well for unrelated trios. At lower false positive rates, the

398 stratified sampling estimates were lower (and in some cases 0) than those from importance  
399 sampling. In these cases, one or more strata had estimates of 0, indicating that the 1,000,000  
400 samples taken were not sufficient to observe one or more false positives. This demonstrates one  
401 of the strengths of importance sampling compared to stratified sampling - some situations will  
402 have false positive rates small enough they cannot be efficiently estimated by this stratified  
403 sampling routine. This is further emphasized by the greater computational effort devoted to  
404 stratified sampling in this study (1,000,000 iterations in each stratum vs. 1,000,000 iterations  
405 total).

406         For false positive error rates under relationships other than unrelated, the importance  
407 sampling and stratified sampling estimates were again largely the same. In a few cases where one  
408 potential grandparent was the true grandparent and the other was not, the estimates were  
409 noticeably different and the stratified sampling method achieved at least 150 false positive  
410 observations in each strata. This suggests that for these relationships the importance sampling  
411 method may have performed suboptimally. Similar observations were made for importance  
412 sampling estimates of false positive error rates in parentage inference, where performance of a  
413 given importance distribution varied depending on the true relationship for which an error rate  
414 was estimated (Anderson and Garza 2006). One strategy would be to design an alternative  
415 importance distribution, but for closely related trios, error rates for most panels will likely be  
416 high enough that they are amenable to stratified sampling.

417         The current method assumes loci are in linkage equilibrium. If loci are physically linked  
418 (but still in equilibrium) the methods described here can be applied with some additional  
419 consideration. Physical linkage of two loci will result in grandchildren being more likely to  
420 inherit alleles at both loci from one of the two grandparents in a trio. The estimated false positive

421 (when true relationship is unrelated) error rates are not affected because unrelated individuals are  
422 not impacted by physical linkage. For the other estimated error rates (false positives for trios  
423 with other relationships and false negatives), the simulated LLRs will have lower variance than  
424 the true distribution, causing error rates to be underestimated.

425 One drawback of the method as implemented is that computational efficiency decreases  
426 with increasing numbers of alleles per locus. This is partly due to the flexibility of the  
427 genotyping error model and the need to marginalize over all possible true genotypes. In the  
428 current implementation, computation is sped up by precomputing likelihood values for observed  
429 trio genotypes at each locus. This works well when the number of alleles per locus is small, but  
430 as the number of alleles increases, this can become impractically slow. As such, the current  
431 implementation will be most suitable to panels containing biallelic SNPs and microhaplotypes,  
432 which in our experience typically have three to five alleles. For panels of highly variable loci, a  
433 different implementation of this method, particularly with a more streamlined genotyping error  
434 model, would be necessary.

435

436 [A]Acknowledgements

437 Funding for this project was provided by Bonneville Power Administration Project 2010-031-00.

438 We would like to thank John Powell, John Hargrove, Matt Corsi, and Eric Anderson for  
439 providing comments that improved this manuscript. There is no conflict of interest declared in  
440 this article.

441

442 [A]References

- 443 Anderson, E. C. 2012. Large-scale parentage inference with SNPs: An efficient algorithm for  
444 statistical confidence of parent pair allocations. *Statistical Applications in Genetics and*  
445 *Molecular Biology* 11(5):12.
- 446 Anderson, E. C., and J. C. Garza. 2005. A description of full parentage genotyping. Vancouver,  
447 British Columbia.
- 448 Anderson, E. C., and J. C. Garza. 2006. The power of single-nucleotide polymorphisms for  
449 large-scale parentage inference. *Genetics* 172(4):2567–2582.
- 450 Araki, H., W. R. Ardren, E. Olsen, B. Cooper, and M. S. Blouin. 2007a. Reproductive success of  
451 captive-bred steelhead trout in the wild: Evaluation of three hatchery programs in the Hood  
452 River. *Conservation Biology* 21(1):181–190.
- 453 Araki, H., B. A. Berejikian, M. J. Ford, and M. S. Blouin. 2008. Fitness of hatchery-reared  
454 salmonids in the wild. *Evolutionary Applications* 1(2):342–355.
- 455 Araki, H., B. Cooper, and M. S. Blouin. 2007b. Genetic effects of captive breeding cause a rapid,  
456 cumulative fitness decline in the wild. *Science* 318(5847):100–103.
- 457 Baetscher, D. S., A. J. Clemento, T. C. Ng, E. C. Anderson, and J. C. Garza. 2018.  
458 Microhaplotypes provide increased power from short-read DNA sequences for relationship  
459 inference. *Molecular Ecology Resources* 18(2):296–305.
- 460 Beacham, T. D. 2021. Parentage-based tagging combined with genetic stock identification is a  
461 cost-effective and viable replacement for coded-wire tagging in large-scale assessments of  
462 Canadian salmon fisheries. *Fisheries Research* 239:105920.
- 463 Beacham, T. D., C. Wallace, K. Jonsen, B. McIntosh, J. R. Candy, D. Willis, C. Lynch, J.-S. S.  
464 Moore, L. Bernatchez, and R. E. Withler. 2019. Comparison of coded-wire tagging with

- 465 parentage-based tagging and genetic stock identification in a large-scale coho salmon  
466 fisheries application in British Columbia, Canada. *Evolutionary Applications* 12(2):230–  
467 254.
- 468 Bingham, D. M., P. C. Gerrity, and S. Painter. 2018. Genetic tagging is an effective way to  
469 monitor survival of released hatchery saugers: Conservation efforts in the Wind River,  
470 Wyoming. *Environmental Practice* 20(4):92–103.
- 471 Campbell, M. R., N. V. Vu, A. P. LaGrange, R. S. Hardy, T. J. Ross, and S. R. Narum. 2019.  
472 Development and application of single-nucleotide polymorphism (SNP) genetic markers for  
473 conservation monitoring of burbot populations. *Transactions of the American Fisheries*  
474 *Society* 148(3):661–670.
- 475 Campbell, N. R., S. A. Harmon, and S. R. Narum. 2015. Genotyping-in-Thousands by  
476 sequencing (GT-seq): A cost effective SNP genotyping method based on custom amplicon  
477 sequencing. *Molecular Ecology Resources* 15(4):855–867.
- 478 Christie, M. R., M. J. Ford, and M. S. Blouin. 2014. On the reproductive success of early-  
479 generation hatchery fish in the wild. *Evolutionary Applications* 7(8):883–896.
- 480 Christie, M. R., M. L. Marine, and M. S. Blouin. 2011. Who are the missing parents?  
481 Grandparentage analysis identifies multiple sources of gene flow into a wild population.  
482 *Molecular Ecology* 20(6):1263–1276.
- 483 Dauer, M. B., T. R. Seamons, L. Hauser, T. P. Quinn, and K. A. Naish. 2009. Estimating the ratio  
484 of hatchery-produced to wild adult steelhead on the spawning grounds using scale pattern  
485 analyses. *Transactions of the American Fisheries Society* 138(1):15–22.
- 486 DeHaan, P. W., G. R. Jordan, and W. R. Ardren. 2008. Use of genetic tags to identify captive-  
487 bred pallid sturgeon (*Scaphirhynchus albus*) in the wild: Improving abundance estimates for

- 488 an endangered species. *Conservation Genetics* 9(3):691–697.
- 489 Denson, M. R., K. Brenkert, W. E. Jenkins, and T. L. Darden. 2012. Assessing red drum juvenile  
490 stocking in a South Carolina estuary using genetic identification. *North American Journal of*  
491 *Fisheries Management* 32(1):32–43.
- 492 van Doornik, D. M., D. L. Eddy, R. S. Waples, S. J. Boe, T. L. Hoffnagle, E. A. Berntson, and P.  
493 Moran. 2013. Genetic monitoring of threatened chinook salmon populations: estimating  
494 introgression of nonnative hatchery stocks and temporal genetic changes. *North American*  
495 *Journal of Fisheries Management* 33(4):693–706.
- 496 Evans, H. K., K. B. Carlson, R. Wisser, M. E. Raley, K. M. Potoka, and K. J. Dockendorf. 2018.  
497 Genetics and hatchery management: A parentage-based tagging approach to blueback  
498 herring conservation. *Journal of Fish and Wildlife Management* 9(1):1–13.
- 499 Ford, M. J. 2002. Selection in captivity during supportive breeding may reduce fitness in the  
500 wild. *Conservation Biology* 16(3):815–825.
- 501 Goodman, D. 2005. Selection equilibrium for hatchery and wild spawning fitness in integrated  
502 breeding programs. *Canadian Journal of Fisheries and Aquatic Sciences* 62(2):374–389.
- 503 Hargrove, J. S., C. A. Camacho, W. C. Schrader, J. H. Powell, T. A. Delomas, J. E. Hess, S. R.  
504 Narum, and M. R. Campbell. 2021. Parentage-based tagging improves escapement  
505 estimates for ESA-listed adult Chinook salmon and steelhead in the Snake River basin.  
506 *Canadian Journal of Fisheries and Aquatic Sciences* 78(4):349–360.
- 507 Hatchery Scientific Review Group. 2009. Columbia River hatchery reform system-wide report.
- 508 Huisman, J. 2017. Pedigree reconstruction from SNP data: parentage assignment, sibship  
509 clustering and beyond. *Molecular Ecology Resources* 17(5):1009–1024.
- 510 Janowitz-Koch, I., C. Rabe, R. Kinzer, D. Nelson, M. A. Hess, and S. R. Narum. 2019. Long-

511 term evaluation of fitness and demographic effects of a chinook salmon supplementation  
512 program. *Evolutionary Applications* 12(3):456–469.

513 Jones, O. R., and J. Wang. 2010. COLONY: A program for parentage and sibship inference from  
514 multilocus genotype data. *Molecular Ecology Resources* 10(3):551–555.

515 Kalinowski, S. T., M. L. Taper, and T. C. Marshall. 2007. Revising how the computer program  
516 CERVUS accommodates genotyping error increases success in paternity assignment.  
517 *Molecular Ecology* 16(5):1099–1106.

518 Lehnert, S. J., S. M. Baillie, J. MacMillan, I. G. Paterson, C. F. Buhariwalla, I. R. Bradbury, and  
519 P. Bentzen. 2020. Multiple decades of stocking has resulted in limited hatchery  
520 introgression in wild brook trout (*Salvelinus fontinalis*) populations of Nova Scotia.  
521 *Evolutionary Applications* 13(5):1069–1089.

522 Letcher, B. H., and T. L. King. 2001. Parentage and grandparentage assignment with known and  
523 unknown matings: Application to Connecticut River Atlantic salmon restoration. *Canadian*  
524 *Journal of Fisheries and Aquatic Sciences* 58(9):1812–1821.

525 Marshall, T. C., J. Slate, L. E. B. Kruuk, and J. M. Pemberton. 1998. Statistical confidence for  
526 likelihood-based paternity inference in natural populations. *Molecular Ecology* 7(5):639–  
527 655.

528 Matala, A. P., S. R. Narum, W. Young, and J. L. Vogel. 2012. Influences of hatchery  
529 supplementation, spawner distribution, and habitat on genetic structure of Chinook salmon  
530 in the South Fork Salmon River, Idaho. *North American Journal of Fisheries Management*  
531 32(2):346–359.

532 Miller, L. M., T. Close, and A. R. Kapuscinski. 2004. Lower fitness of hatchery and hybrid  
533 rainbow trout compared to naturalized populations in Lake Superior tributaries. *Molecular*



- 534 Ecology 13(11):3379–3388.
- 535 Mobernd, L. E., J. Barr, L. Blankenship, D. E. Campton, T. T. P. Evelyn, T. A. Flagg, C. V. W.
- 536 Mahnken, L. W. Seeb, P. R. Seidel, and W. W. Smoker. 2005. Hatchery Reform in
- 537 Washington State. *Fisheries* 30(6):11–23.
- 538 Owen, A. B. 2013. Monte Carlo theory, methods and examples.
- 539 Ozerov, M. Y., R. Gross, M. Bruneaux, J. P. Vähä, O. Burimski, L. Pukk, and A. Vasemägi. 2016.
- 540 Genomewide introgressive hybridization patterns in wild Atlantic salmon influenced by
- 541 inadvertent gene flow from hatchery releases. *Molecular Ecology* 25(6):1275–1293.
- 542 Riester, M., P. F. Stadler, and K. Klemm. 2009. FRANz: Reconstruction of wild multi-generation
- 543 pedigrees. *Bioinformatics* 25(16):2134–2139.
- 544 SanCristobal, M., and C. Chevalet. 1997. Error tolerant parent identification from a finite set of
- 545 individuals. *Genetical Research* 70(1):53–62.
- 546 Sard, N. M., D. P. Jacobson, and M. A. Banks. 2016. Grandparentage assignments identify
- 547 unexpected adfluvial life history tactic contributing offspring to a reintroduced population.
- 548 *Ecology and Evolution* 6(19):6773–6783.
- 549 Steele, C. A., E. C. Anderson, M. W. Ackerman, M. A. Hess, N. R. Campbell, S. R. Narum, and
- 550 M. R. Campbell. 2013. A validation of parentage-based tagging using hatchery steelhead in
- 551 the Snake River basin. *Canadian Journal of Fisheries and Aquatic Sciences* 70(7):1046–
- 552 1054.
- 553 Steele, C. A., M. Hess, S. Narum, and M. Campbell. 2019. Parentage-based tagging: Reviewing
- 554 the implementation of a new tool for an old problem. *Fisheries* 44(9):412–422.
- 555 Tattam, I. A., and J. R. Ruzycki. 2020. Smolt Transportation Influences Straying of Wild and
- 556 Hatchery Snake River Steelhead into the John Day River. *Transactions of the American*

557 Fisheries Society 149(3):284–297.

558 Thompson, E. 1976. Inference of genealogical structure. *Social Science Information* 15(2–  
559 3):477–526.

560 Thompson, E. 2000. *Statistical inference from genetic data on pedigrees*. Institute of  
561 Mathematical Statistics, Beachwood, OH.

562 Vandeputte, M., A. Bestin, L. Fauchet, J. M. Allamellou, S. Bosc, O. Menchi, P. Haffray, and C.  
563 Saavedra. 2021. Can we identify wild-born salmon from parentage assignment data? A case  
564 study in the Garonne-Dordogne rivers salmon restoration programme in France. *Aquatic*  
565 *Living Resources* 34:7.

566 Waples, R. S., M. J. Ford, and D. Schmitt. 2007. Empirical results of salmon supplementation in  
567 the northeast pacific: a preliminary assessment. Pages 383–403 *in* T. M. Bert, editor.  
568 *Ecological and Genetic Implications of Aquaculture Activities*.

569 Warren, C., S. Rosenberger, and F. Bohlen. 2017. 2015 calendar year hatchery steelhead report:  
570 IPC and LSRCP monitoring and evaluation programs for the state of Idaho. IDFG Report  
571 Number 17-05

572

| Hatchery | Data used         | Number of possible crosses per year | Years of potential grandparents | Number of potential grandchildren | Number of comparisons | Desired per-comparison false positive error rate |
|----------|-------------------|-------------------------------------|---------------------------------|-----------------------------------|-----------------------|--------------------------------------------------|
| USB      | None              | 4,290                               |                                 |                                   | 3,432,000             | $2.91 \cdot 10^{-8}$                             |
|          | Sex               | 1,088                               |                                 |                                   | 870,400               | $1.15 \cdot 10^{-7}$                             |
|          | Spawn day         | 584                                 |                                 |                                   | 467,200               | $2.14 \cdot 10^{-7}$                             |
|          | Spawn day and sex | 162                                 |                                 |                                   | 129,600               | $7.72 \cdot 10^{-7}$                             |
|          | Cross records     | 34                                  |                                 |                                   | 27,200                | $3.68 \cdot 10^{-6}$                             |
| DNFH     | None              | 3,134,670                           | 4                               | 200                               | 2,507,736,000         | $3.99 \cdot 10^{-11}$                            |
|          | Sex               | 769,348                             |                                 |                                   | 615,478,400           | $1.62 \cdot 10^{-10}$                            |
|          | Spawn day         | 284,270                             |                                 |                                   | 227,416,000           | $4.40 \cdot 10^{-10}$                            |
|          | Spawn day and sex | 69,709                              |                                 |                                   | 55,767,200            | $1.79 \cdot 10^{-9}$                             |
|          | Cross records     | 1,003                               |                                 |                                   | 802,400               | $1.25 \cdot 10^{-7}$                             |

1 Table 1. Desired per-comparison false positive (true relationship of unrelated) error rates for analyses using different data sources to  
2 reduce the number of comparisons.  
3

- 1 Figure Legends
- 2 Figure 1. The pedigree the proposed method could be used to infer. H: hatchery-origin, W:  
3 natural-origin
- 4 Figure 2. Error rates estimated by importance sampling for simulated (A) SNP and (B)  
5 microhaplotype panels with varying numbers of loci.
- 6 Figure 3. Comparison of false positive (true relationship of unrelated) error rates for simulated  
7 microhaplotype panels estimated by importance sampling and stratified sampling. The black line  
8 represents  $y = x$ . Points shown on the y-axis had an estimated error rate of 0 from stratified  
9 sampling.
- 10 Figure 4. Comparison of false positive error rates estimated by importance sampling and  
11 stratified sampling for related trios with the simulated 300 locus microhaplotype panel. The  
12 black line represents  $y = x$ . The two putative grandparents were unrelated to each other. The  
13 relationship labels indicate the relationship of the two putative grandparents to the putative  
14 grandchild. Where the label is only one relationship, both putative grandparents have the same  
15 relationship to the putative grandchild. True is true grandparent, GAunt is great-aunt, HGAunt is  
16 half great-aunt, GpCous is first-cousin to the putative grandchild's true grandparent, Unrel is  
17 unrelated. The inset gives a magnified view of the region containing error rates close to 1.
- 18 Figure 5. Error rates estimated by importance sampling for the simulated 300 locus  
19 microhaplotype panel with two rates of missing genotypes: 3% (Missing) and 0% (No missing).  
20 False positive error rate is the rate for unrelated trios.

21 Supplemental Figure 1. Error rates estimated by stratified sampling for the simulated 300 locus  
22 microhaplotype panel for select related trios. The two putative grandparents were unrelated to  
23 each other. The relationship labels indicate the relationship of the two putative grandparents to  
24 the putative grandchild. True is true grandparent, GAunt is great-aunt, HGAunt is half great-aunt,  
25 Unrel is unrelated.

26

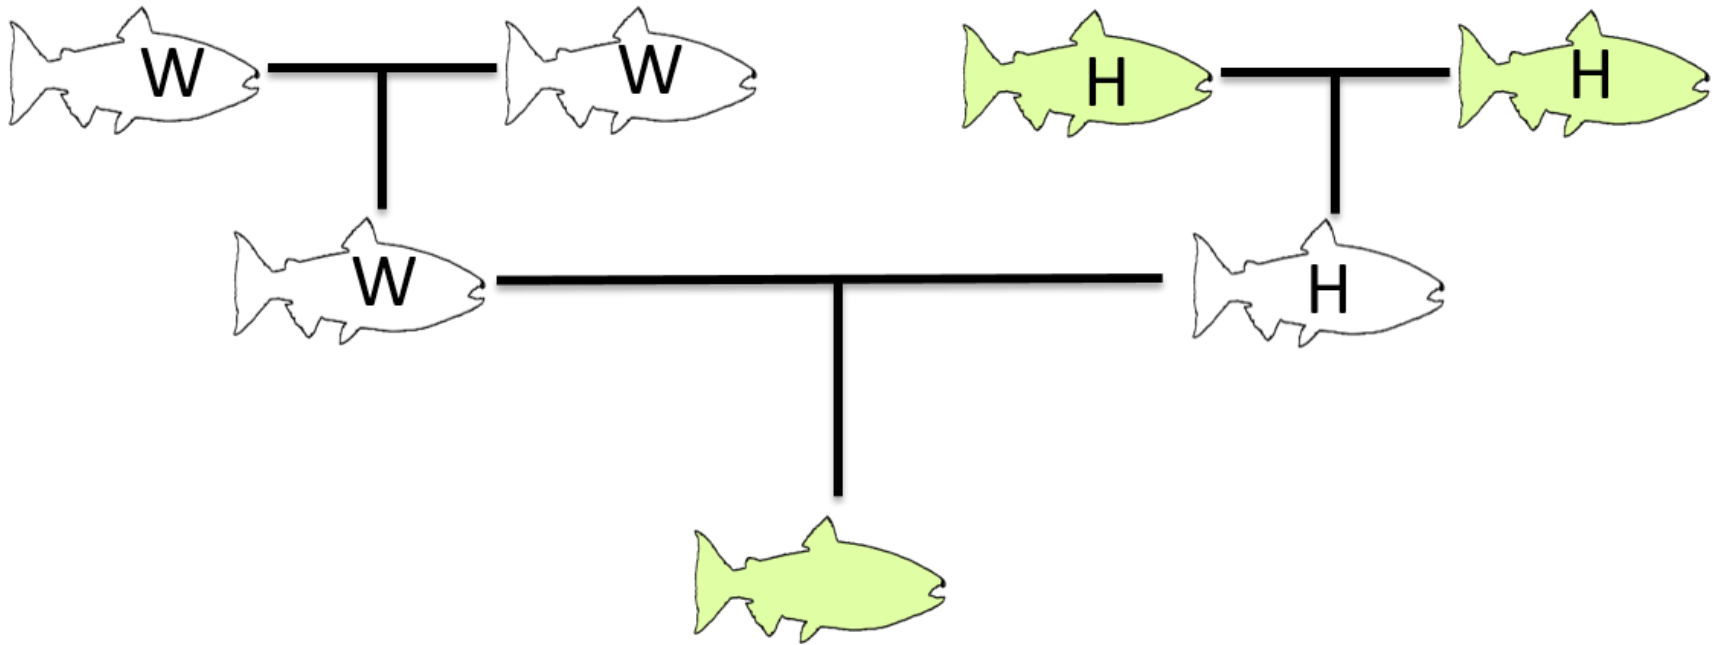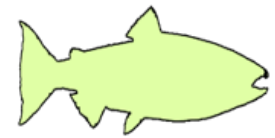

Sampled

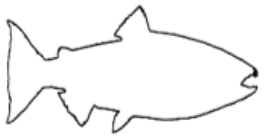

Unsampled

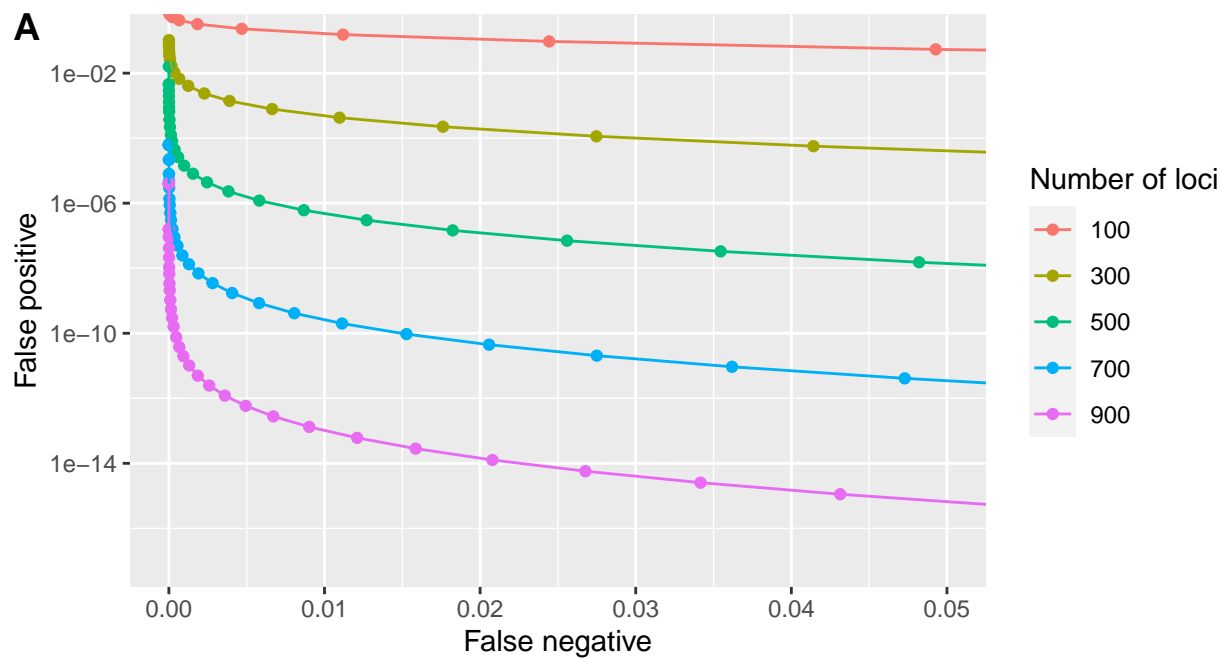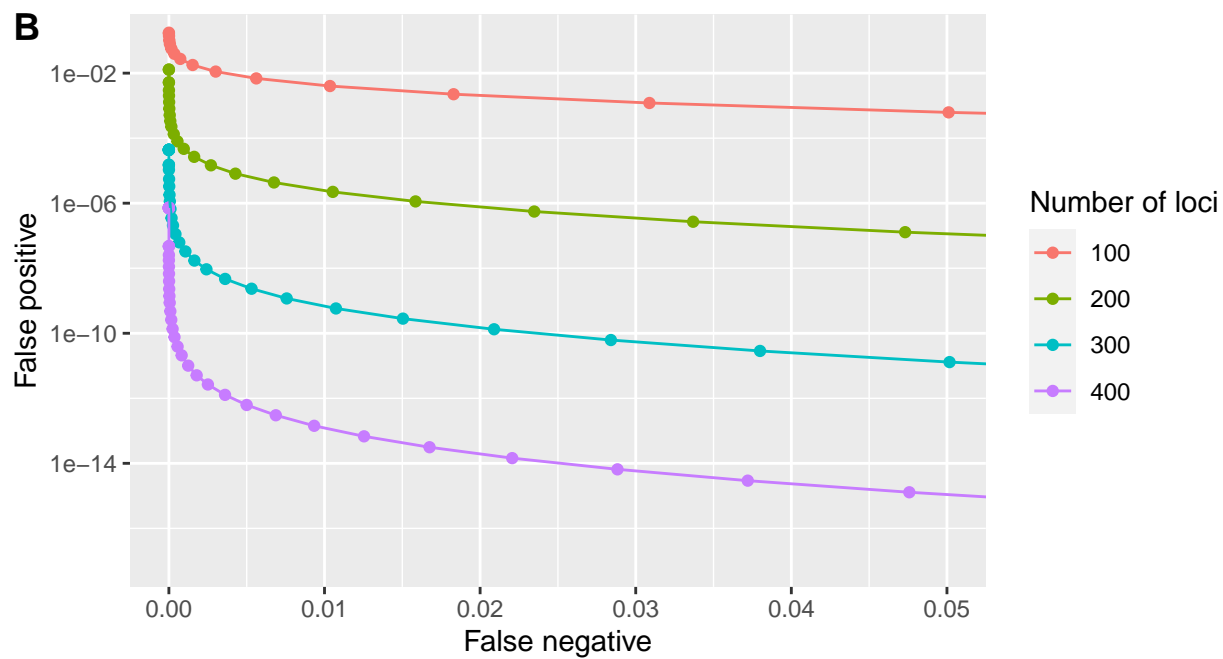

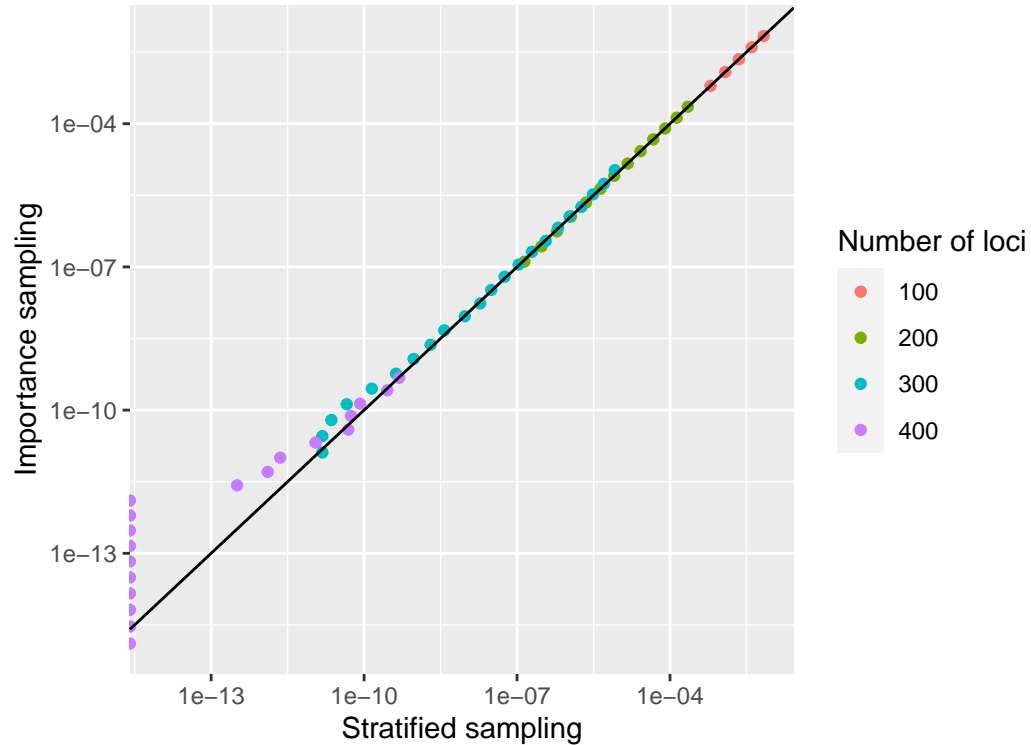



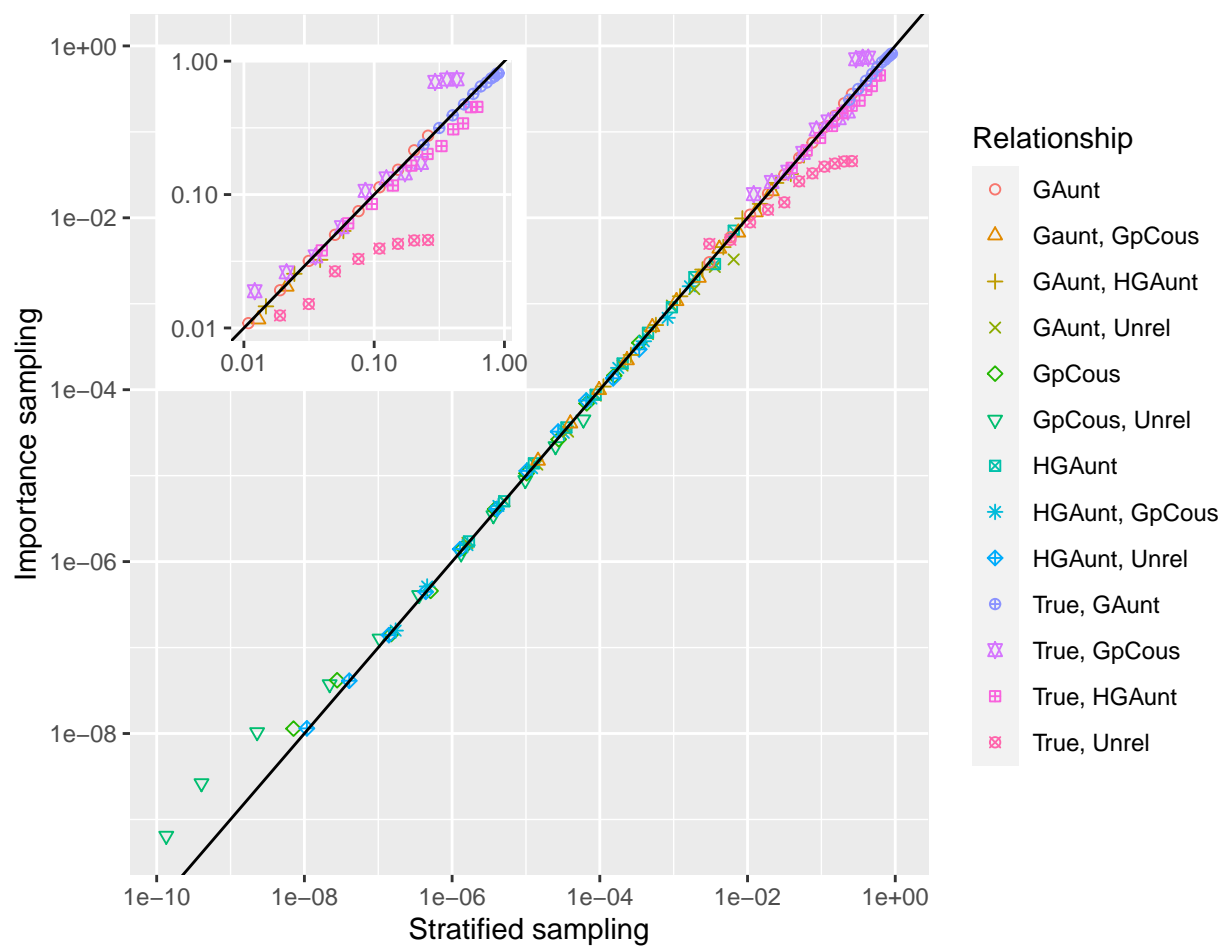

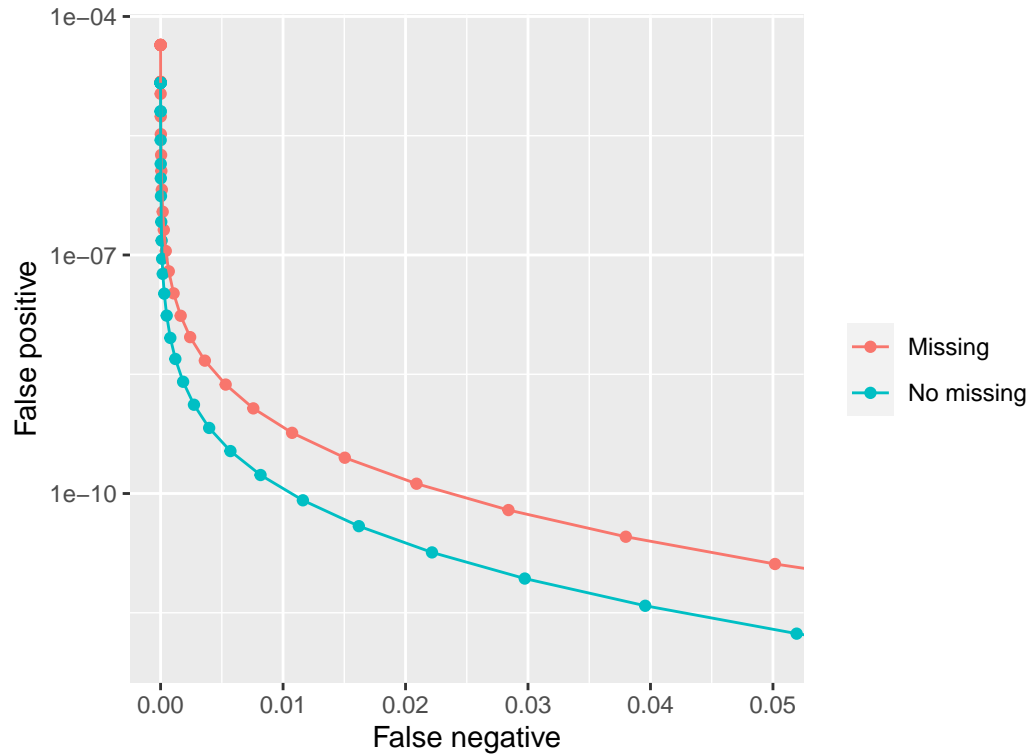

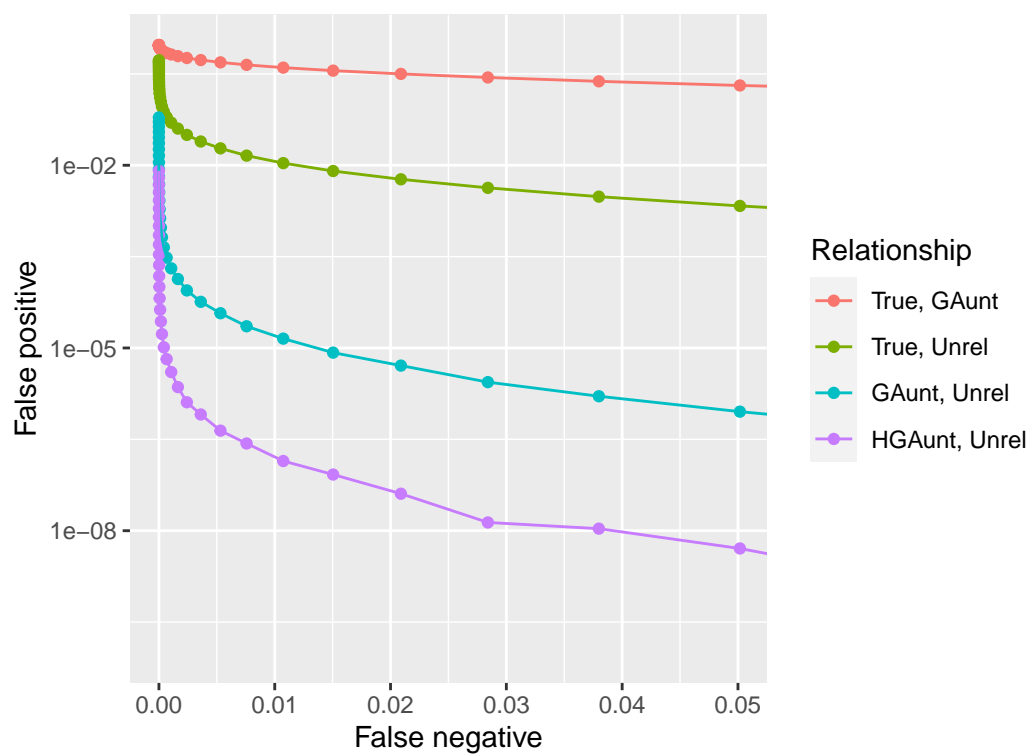

1  
2

## Supplementary file 1

### 3 1 Default error model for gRandma

4 Each locus is treated separately and each genotype is treated as two observations (one for each allele in the  
5 presumed diploid). For a given locus, the error model first relies upon a "per allele error rate",  $\epsilon$ , which  
6 represent the probability that, when observing one allele, you observe any allele other than the true one.  
7 The default value is 0.005, or 0.5%. This value is used along with a measure of similarity between alleles to  
8 calculate the probability of observing each allele given the true allele. For a locus with  $I$  alleles, given the  
9 true allele  $i$ , the probability of correctly observing  $i$  is  $1 - \epsilon$  and the probability of observing allele  $j$  where  
10  $j \neq i$  is

$$P(j|i) = \epsilon \cdot \frac{s_{ij}}{\sum_{k=1}^I s_{ik}}, \quad (1)$$

11 where  $s_{ij}$  is the similarity between alleles  $i$  and  $j$  and  $s_{ii} = 0$ . The measure of similarity between two alleles  
12 of a microhaplotype used here was the reciprocal of the number of base pair differences between them.

13 These probabilities are then used to calculate the probability of observing each genotype given a true  
14 homozygous genotype. The probability of observing a genotype of BC given a true genotype of AA is

$$P(BC|AA) = \begin{cases} 2 \cdot P(B|A)P(C|A), & B \neq C \\ P(B|A)^2, & B = C, \end{cases} \quad (2)$$

15 according to basic probability arguments, where  $P(B|A)$  is the probability of observing B when the true allele  
16 is A. The probability of observing each possible genotype given a true heterozygous genotype is calculated  
17 similarly, but also incorporates a probability of allelic dropout for each allele. Each allele is given a probability  
18 of dropping out,  $d_i$  for allele  $i$ , and in the current study a probability of 0.005 was used for all alleles.  
19 It is assumed that allelic dropout events are disjoint, and so the probability of no dropout occurring is  
20  $1 - d_i - d_j$ . The probability of observing each genotype given no dropout can be calculated using the  
21 observation probabilities for each allele calculated in equation 1. The probability of observing a given  
22 genotype if a dropout has occurred is taken to be the probability of observing that genotype given a true  
23 homozygous genotype for the remaining allele. The total probability of observing a genotype is the sum of

24 the probabilities of all three cases (no dropout, allele 1 dropout, allele 2 dropout).
